# Supplementary material for: Functional Study of Different Lignocellulases from Trichoderma guizhouence NJAU4742 in the Synergistic Degradation of Natural Straw
Source: MDPI journal article supplement (doi:10.3390/fermentation10050230), 2024-04-26
Supplement: s1 [file s1]

Supplementary data for

# Functional Study of Different Lignocellulases from *Trichoderma guizhouense* NJAU4742 in the Synergistic Degradation of Natural Straw

Tuo Li <sup>1,2</sup>, Ronghua Pei <sup>1,2</sup>, Jiaguo Wang <sup>1,2</sup>, Yihao Zhou <sup>1,2</sup> and Dongyang Liu <sup>1,2,\*</sup>

<sup>1</sup> Key Lab of Organic-Based Fertilizers of China and Jiangsu Provincial Key Lab of Solid Organic Waste Utilization, Nanjing 210095, China; lituo@njau.edu.cn (T.L.); 2021103111@stu.njau.edu.cn (R.P.); 2021103116@stu.njau.edu.cn (J.W.); hao13207067830@163.com (Y.Z.)

<sup>2</sup> College of Resources and Environmental Sciences, Nanjing Agricultural University, Nanjing 210095, China

\* Correspondence: liudongyang@njau.edu.cn; Tel./Fax: +86-25-84396853

Number of pages: 7

Number of figures: 6

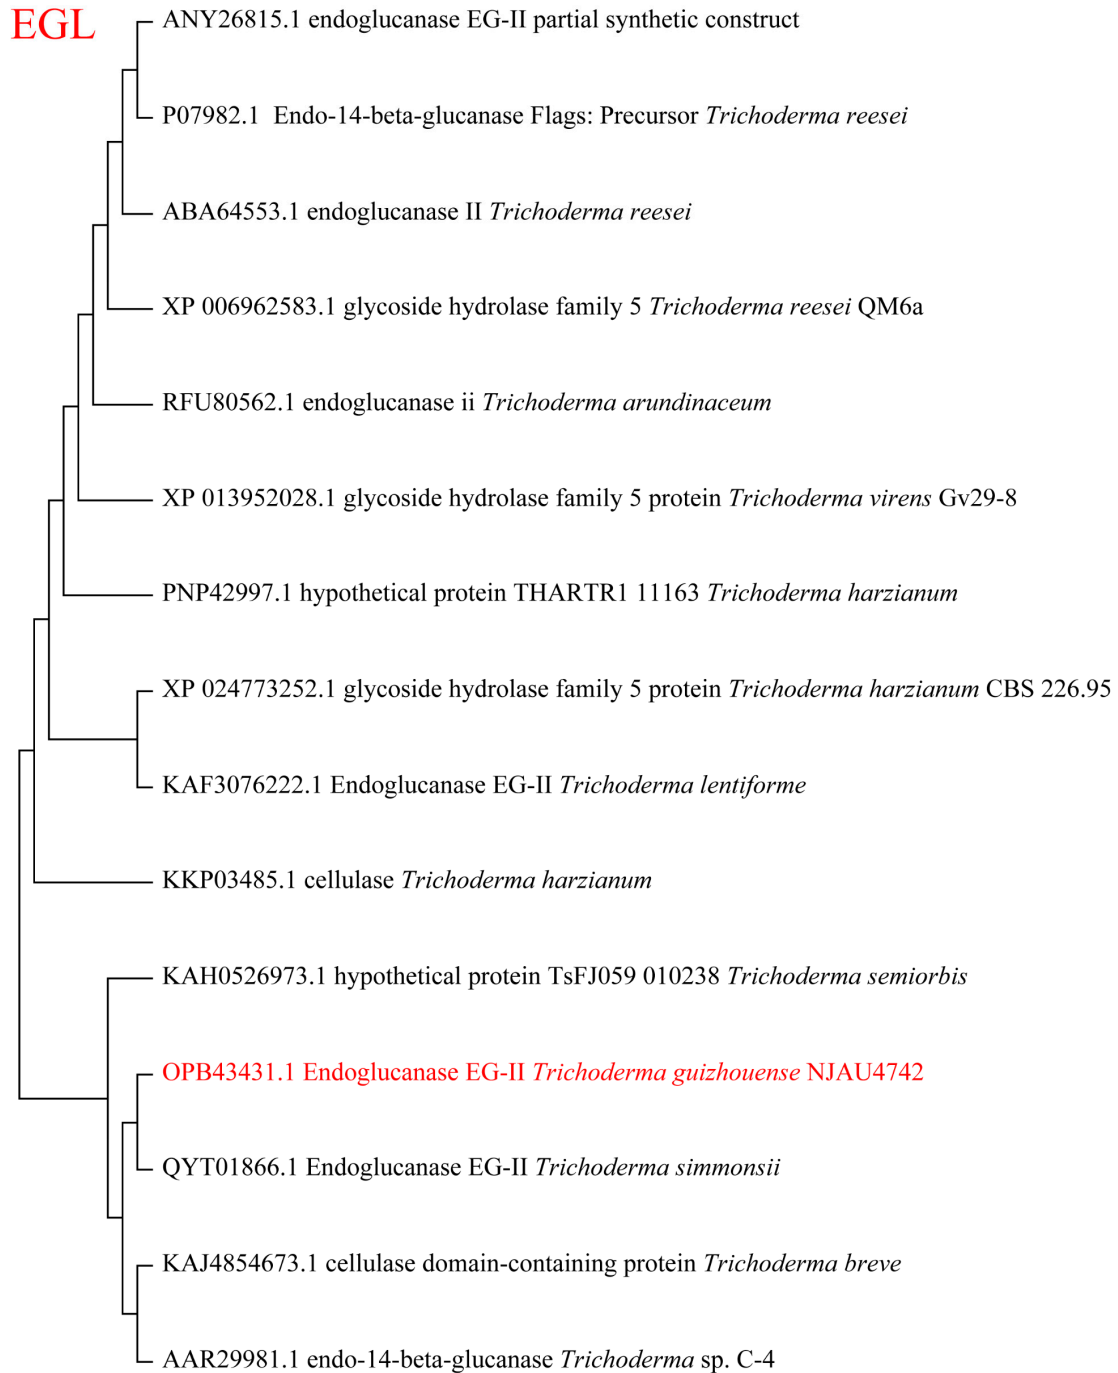

**Figure S1.** The phylogenetic trees of EGL by performing multiple sequence alignments using MEGAX software.

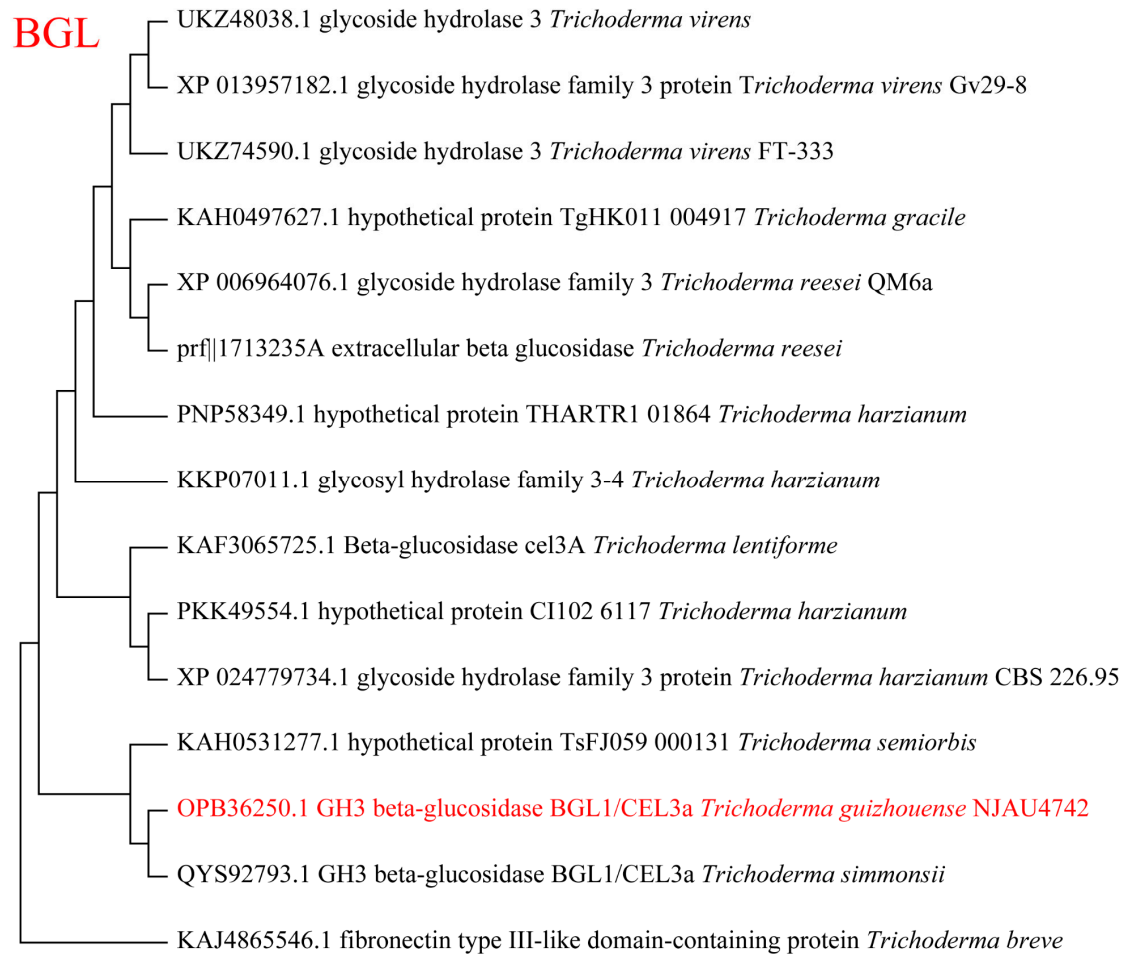

**Figure S2.** The phylogenetic trees of BGL by performing multiple sequence alignments using MEGAX software.

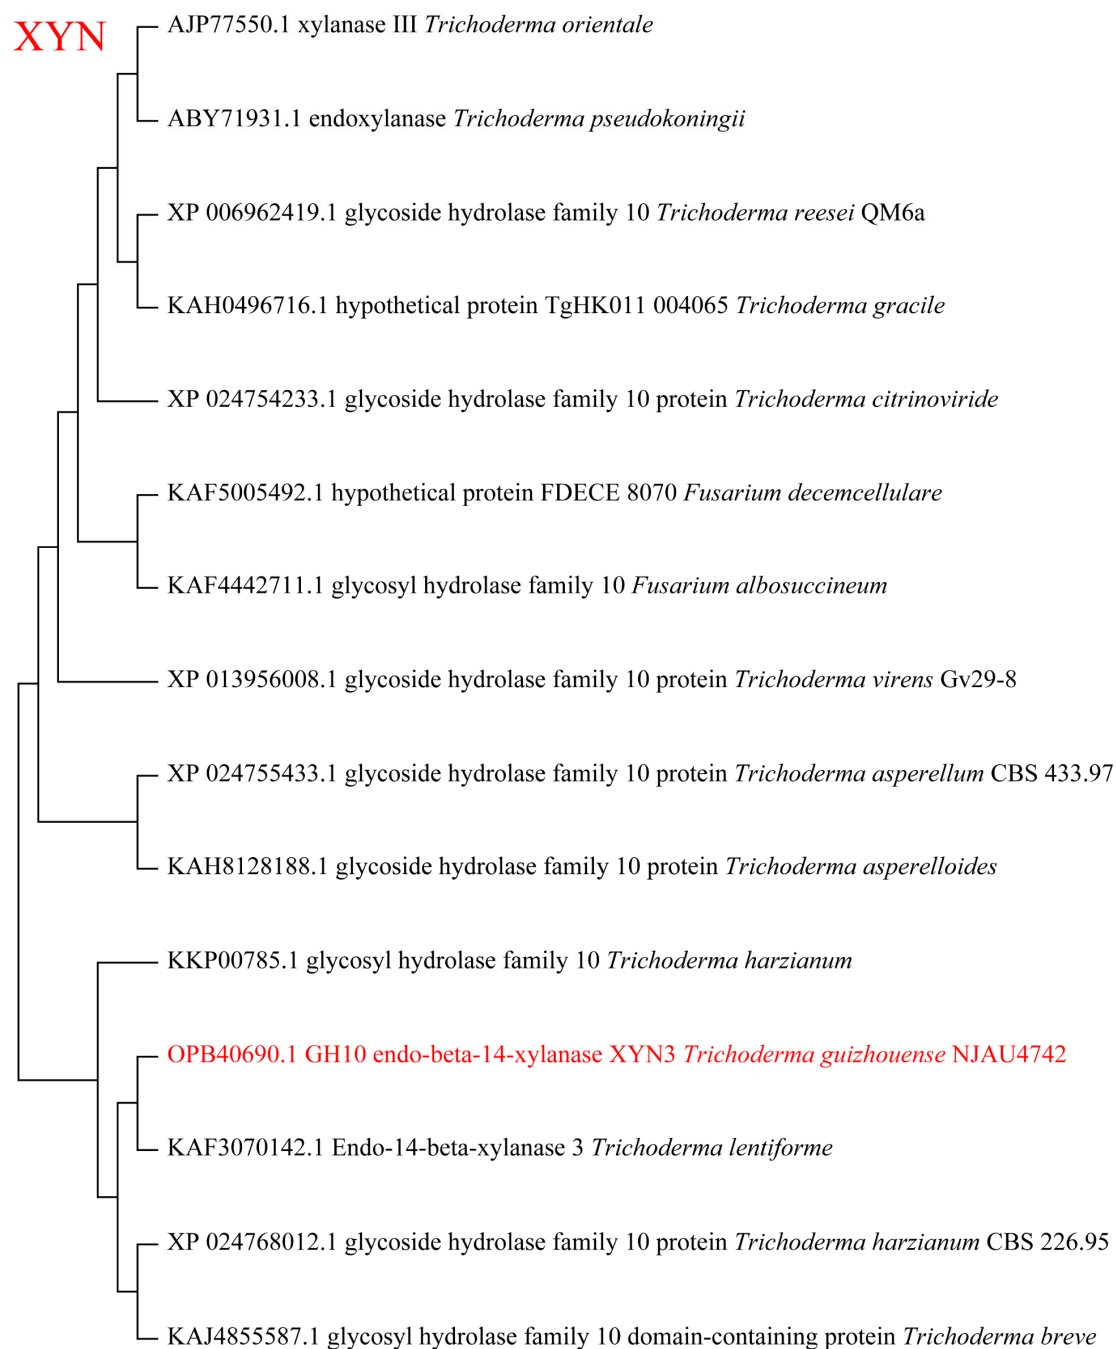

**Figure S3.** The phylogenetic trees of XYN by performing multiple sequence alignments using MEGAX software.

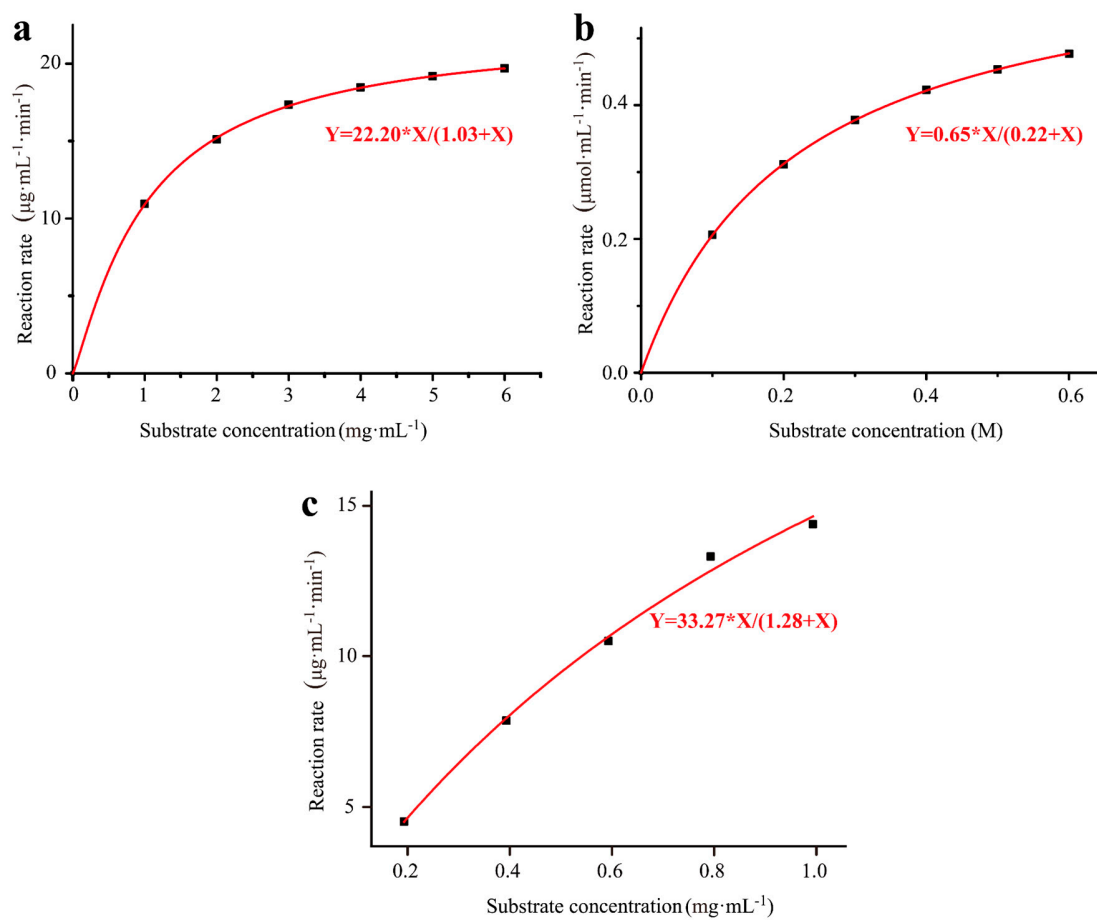

**Figure S4.** Kinetic analysis of EGL (a), BLG (b), and XYN (c), respectively.

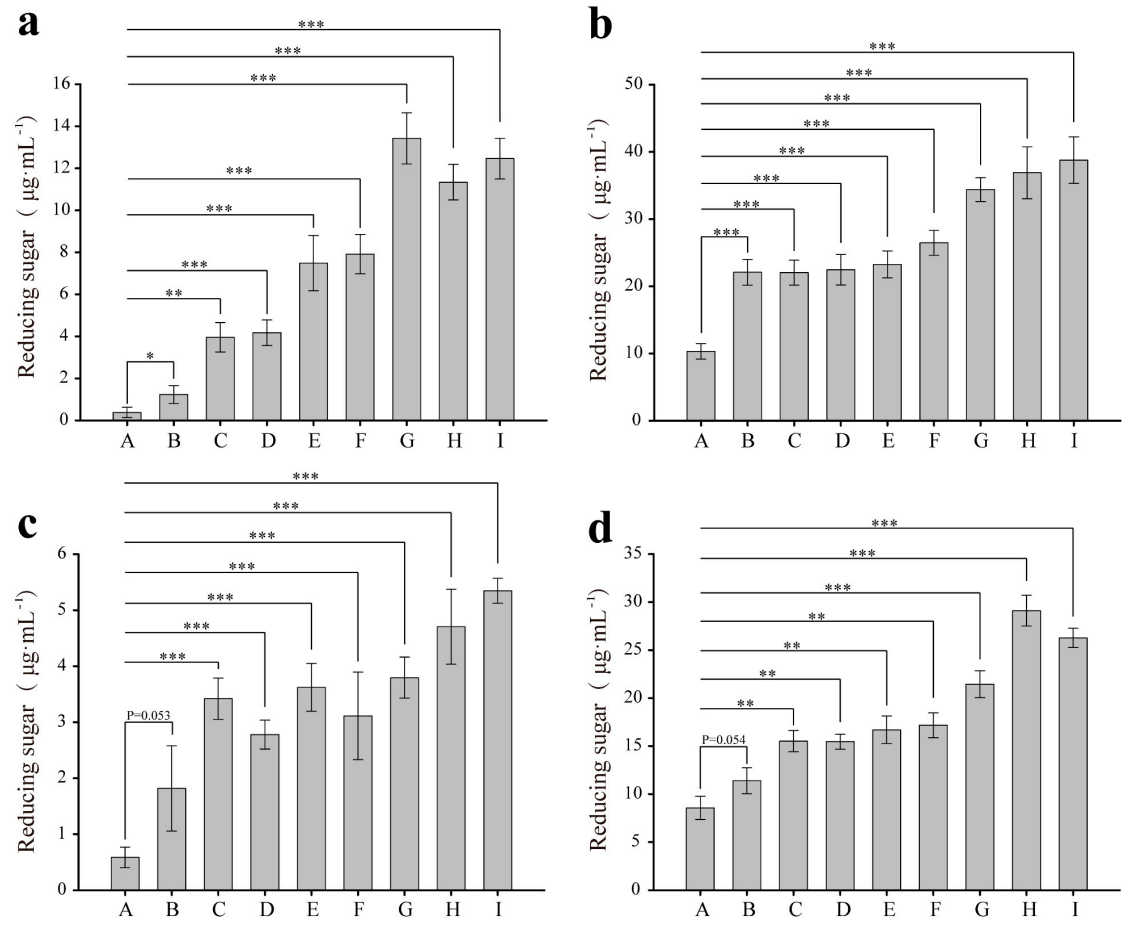

**Figure S5.** Synergistic degradation of different natural substrates by EGL and BGL. a: wheat straw; b: soybean straw; c: rice straw; d: corn straw. Different letters on the x-axis represent different proportions of the three hydrolytic enzymes added. A: 0.05 M EGL; B: 0.05 M EGL + 0.01 M BGL; C: 0.05 M EGL + 0.02 M BGL; D: 0.05 M EGL + 0.03 M BGL; E: 0.05 M EGL + 0.04 M BGL; F: 0.05 M EGL + 0.05 M BGL; G: 0.05 M EGL + 0.06 M BGL; H: 0.05 M EGL + 0.07 M BGL; I: 0.05 M EGL + 0.08 M BGL. \*\*\*  $P < 0.001$ , \*\*  $P < 0.01$ , \*  $P < 0.05$ .

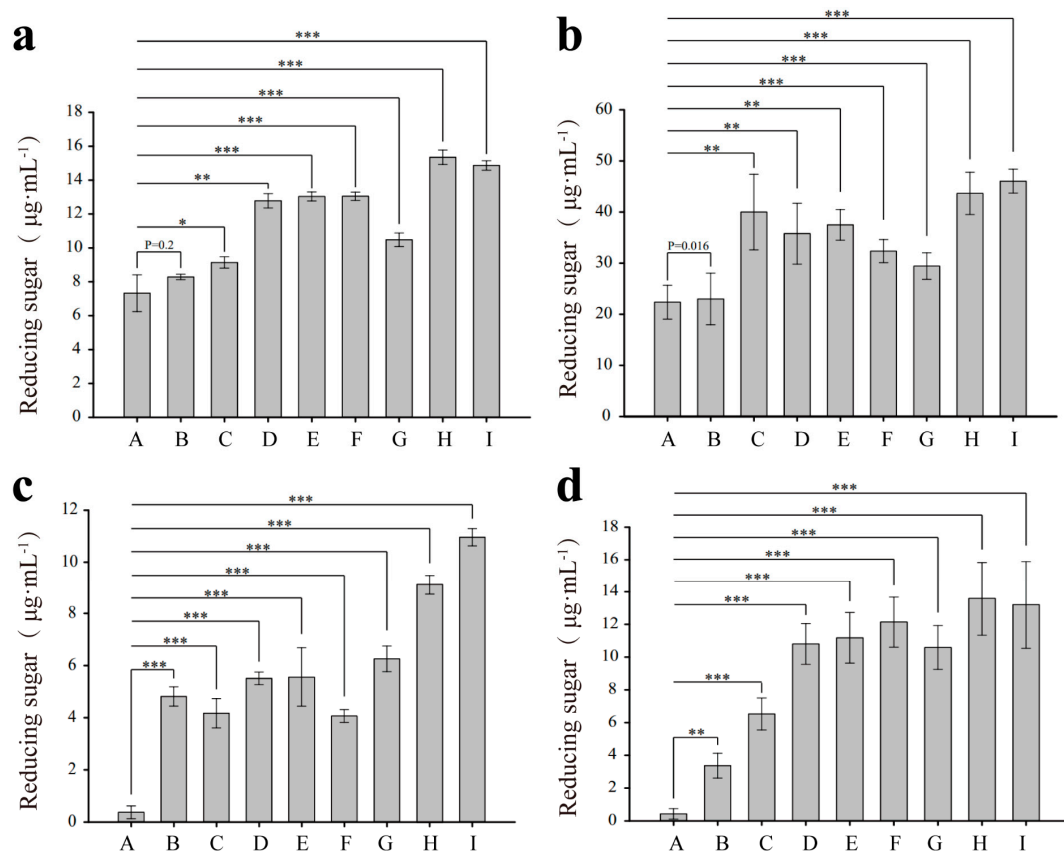

**Figure S6.** Synergistic degradation of different natural substrates by EGL and XYN. a: wheat straw; b: soybean straw; c: rice straw; d: corn straw. Different letters on the x-axis represent different proportions of the three hydrolytic enzymes added. A: 0.1 M XYN; B: 0.1 M XYN + 0.01 M EGL; C: 0.1 M XYN + 0.02 M EGL; D: 0.1 M XYN + 0.03 M EGL; E: 0.1 M XYN + 0.04 M EGL; F: 0.1 M XYN + 0.05 M EGL; G: 0.1 M XYN + 0.06 M EGL; H: 0.1 M XYN + 0.07 M EGL; I: 0.1 M XYN + 0.08 M EGL. \*\*\*  $P < 0.001$ , \*\*  $P < 0.01$ , \*  $P < 0.05$ .
